# Supplementary material for: Clostridium difficile-associated Diarrhea in Developing Countries: A Systematic Review and Meta-Analysis
Source: PubMed Central journal article supplement — Infect Dis Ther. 2019 Jan 18;8(1):87–103. doi: 10.1007/s40121-019-0231-8 (PMC6374231; doi:10.1007/s40121-019-0231-8), 2019-01-18
Supplement: 40121_2019_231_MOESM1_ESM.pdf [file 40121_2019_231_MOESM1_ESM.pdf]

## Supplementary Table 1

### Literature search strategy

#### Databases

- MEDLINE/PubMed (<https://www.ncbi.nlm.nih.gov/pubmed/>)
- Scopus (<https://www.scopus.com/search/form.uri?display=basic>)
- LILACS (<http://lilacs.bvsalud.org/en/>)

#### Search strings

##### AfME

((((((((((((((("South Africa"[Mesh]) OR "Tunisia"[Mesh]) OR "Egypt"[Mesh]) OR "Lebanon"[Mesh]) OR "Bahrain"[Mesh]) OR "Iraq"[Mesh]) OR "Kuwait"[Mesh]) OR "Oman"[Mesh]) OR "Qatar"[Mesh]) OR "Saudi Arabia"[Mesh]) OR "United Arab Emirates"[Mesh]) OR "Africa region"[Mesh]) OR "Africa"[Mesh]) AND "Clostridium difficile"

##### LATAM

((((((((((((((("Argentina"[Mesh]) OR "Chile"[Mesh]) OR "Uruguay"[Mesh]) OR "Paraguay"[Mesh]) OR "Brazil"[Mesh]) OR "Bolivia"[Mesh]) OR "Peru"[Mesh]) OR "Ecuador"[Mesh]) OR "Colombia"[Mesh]) OR "Venezuela"[Mesh]) OR "Costa Rica"[Mesh]) OR "Panama"[Mesh]) OR "Guatemala"[Mesh]) OR "Honduras"[Mesh]) OR "Nicaragua"[Mesh]) OR "El Salvador"[Mesh]) OR "Mexico"[Mesh]) OR "Caribbean Region"[Mesh]) AND "Clostridium difficile"

##### ASIA

((((((("India"[Mesh]) OR "Taiwan"[Mesh]) OR "Singapore"[Mesh]) OR "Hong Kong"[Mesh]) OR "Pakistan"[Mesh]) OR "Indonesia"[Mesh]) OR "Malasya"[Mesh]) OR "Tahiland"[Mesh]) OR "Philippines"[Mesh]) AND "clostridium difficile"

##### CHINA

("China"[Mesh]) AND "clostridium difficile"
